# Supplementary material for: MechRNA: prediction of lncRNA mechanisms from RNA–RNA and RNA–protein interactions
Source: Oxford University Press journal article supplement (doi:10.1093/bioinformatics/bty208), 2018-03-27
Supplement: bioinformatics_34_18_3101_s6.pdf [file bioinformatics_34_18_3101_s6.pdf]

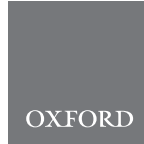

## RNA Biology

# Supplementary Methods and Discussion

Alexander R. Gawronski<sup>1,\*</sup>, Michael Uhl<sup>3</sup>, S. Cenk Sahinalp<sup>2,4,\*</sup>, Rolf Backofen<sup>3,\*</sup>

<sup>1</sup> Computing Science, Simon Fraser University, Burnaby, Canada

<sup>2</sup> Vancouver Prostate Centre, Vancouver, BC, Canada

<sup>3</sup> Institut für Informatik, University of Freiburg, Freiburg im Breisgau, Germany

<sup>4</sup> Department of Computer Science, Indiana University, Bloomington, USA

\*To whom correspondence should be addressed.

Associate Editor: XXXXXXX

Received on XXXXX; revised on XXXXX; accepted on XXXXX

## 1 Methodological Details of IntaRNA2

The next stage is the prediction of RNA-RNA interactions using IntaRNA2 (Mann *et al.*, 2017) with the modifications outlined above. IntaRNA is a popular accessibility-based tool known for its highly competitive performance (Lai and Meyer, 2016). The hybridization calculation follows that of RNAHybrid (Rehmsmeier *et al.*, 2004) with a time and space complexity of  $O(nm)$ . The accessibility is calculated in  $O(nL^2)$  using RNAplfold (Bernhart *et al.*, 2006), an algorithm that computes accessibility in a locally folded region of length  $L$ . Both energy contributions are calculated for every combination of intervals on both sequences requiring a time and space complexity of  $O(n^2m^2)$ . Using the same restriction on interaction length  $w$  as RNAup (Muckstein *et al.*, 2006), the time and space complexity is  $O(nmw^2)$ . By using sparsification (Figure 1), this complexity is further reduced to  $O(nm)$  space and  $O(n\bar{m})$  time where  $\bar{m} = \max(m, L^3)$ .

$$E \left( \begin{array}{c} \text{RNA1} \\ \text{RNA2} \end{array} \right) = \min_{p,q} \left\{ \begin{array}{l} E \left( \begin{array}{c} \text{RNA1} \\ \text{RNA2} \end{array} \right) + E \left( \begin{array}{c} \text{RNA1} \\ \text{RNA2} \end{array} \right) \\ - E \left( \begin{array}{c} \text{RNA1} \\ \text{RNA2} \end{array} \right) \\ + E \left( \begin{array}{c} \text{RNA1} \\ \text{RNA2} \end{array} \right) \end{array} \right\}$$

**Fig. 1.** Heuristic for reducing time complexity of IntaRNA (figure taken from (Busch *et al.*, 2008)). The top energies are of the hybridization and the two bottom energies are for the accessibilities. The accessibilities are not additive so the contribution needs to be subtracted and then added back with the extended region.

## 2 P-value Computation for Predicted Interactions

### 2.1 RNA-RNA Interactions

In a previous work, RNA-RNA interaction energies were fitted to a generalized extreme value (GEV) distribution in order to compute interaction p-values (Wright *et al.*, 2014). From our recent experience we found that a gamma distribution fits the data better (data not shown), so it was used for all experiments. Regardless, we support a CopraRNA-style GEV approach through a user-specified parameter. We first compute a background gamma cumulative distribution function (CDF), which has two parameters: shape ( $\alpha$ ) and rate ( $\beta$ ) (Equation 1-3). The background values are obtained by assuming that a top percent (default 3%) are true interactions and the rest are background. The parameters of the function are estimated using maximum-likelihood fitting. This is done using the “fit” function in the python “stats” package from the scipy library (Jones *et al.*, 2001). With these estimated  $\alpha$  and  $\beta$  parameters, the p-values for each energy value ( $x$ ) can be computed using the survival function  $(1 - \text{cdf}(x))$ .

$$F(x; \alpha, \beta) = \int_0^x f(u; \alpha, \beta) du \quad (1)$$

$$f(x; \alpha, \beta) = \frac{\beta^\alpha x^{\alpha-1} e^{-x\beta}}{\Gamma(\alpha)} \quad (2)$$

$$\Gamma(\alpha) = \int_0^\infty x^{\alpha-1} e^{-x} dx \quad (3)$$

### 2.2 RNA-Protein Interactions

P-values for each peak score were calculated based on position-wise score data from 5000 randomly selected transcripts, using R’s empirical cumulative distribution function (ECDF). The function returns the p-value of a given score based on the constructed ECDF and the `ecdf()` object can be stored on disk for subsequent recalculations (found together with models in Supplementary file 1). We chose this non-parametric approach since the scores did not show a clear unimodal distribution for most models,

Table 1. Used GraphProt models with model parameters, training set information and filter p-values. GraphProt model parameters are: epochs, lambda, R, D, bitsize, abstraction. PMID: data source pubmed ID, method: CLIP-seq protocol, filter\_p: p-value used for filtering predicted sites, pos\_tr: number of positive training sites, neg\_tr: number of negative training sites

| RBP       | PMID     | method  | model_type | filter_p     | epochs | lambda   | R | D | bitsize | abstraction | pos_tr | neg_tr | ROC     | APR     |
|-----------|----------|---------|------------|--------------|--------|----------|---|---|---------|-------------|--------|--------|---------|---------|
| AGO1-4    | 20371350 | PARCLIP | structure  | 0.02376089   | 20     | 0.000001 | 4 | 1 | 14      | 3           | 36802  | 31310  | 0.85584 | 0.86766 |
| ELAVL1    | 21723170 | PARCLIP | sequence   | 0.001640548  | 10     | 0.001    | 3 | 5 | 14      | -           | 7747   | 7750   | 0.92887 | 0.94365 |
| EWSR1     | 20371350 | PARCLIP | sequence   | 0.005115178  | 50     | 0.001    | 1 | 2 | 14      | -           | 16292  | 14720  | 0.94345 | 0.9496  |
| FMR1      | 27018577 | eCLIP   | structure  | 0.04819012   | 40     | 0.0001   | 4 | 5 | 14      | 3           | 2587   | 2587   | 0.88109 | 0.87115 |
| FUS       | 22081015 | PARCLIP | sequence   | 0.003591709  | 40     | 0.0001   | 1 | 1 | 14      | -           | 34581  | 31480  | 0.96988 | 0.97034 |
| HNRNPC    | 27018577 | eCLIP   | sequence   | 0.0006383588 | 50     | 0.001    | 3 | 6 | 14      | -           | 2511   | 2511   | 0.95636 | 0.95178 |
| HNRNPK    | 27018577 | eCLIP   | sequence   | 0.0011904    | 10     | 0.001    | 2 | 1 | 14      | -           | 2674   | 2673   | 0.9823  | 0.98059 |
| IGF2BP1-3 | 20371350 | PARCLIP | structure  | 0.01519445   | 50     | 0.0001   | 4 | 0 | 14      | 3           | 8539   | 6838   | 0.88223 | 0.89533 |
| KHDRBS1   | 27018577 | eCLIP   | structure  | 0.003200621  | 40     | 0.001    | 3 | 2 | 14      | 3           | 2552   | 2552   | 0.9234  | 0.92122 |
| MOV10     | 22844102 | PARCLIP | sequence   | 0.02331425   | 20     | 0.001    | 4 | 2 | 14      | -           | 13793  | 12987  | 0.79824 | 0.7715  |
| PUM2      | 27018577 | PARCLIP | sequence   | 0.002040983  | 40     | 0.001    | 4 | 4 | 14      | -           | 9116   | 8227   | 0.94144 | 0.95158 |
| QKI       | 27018577 | eCLIP   | structure  | 0.0006862552 | 40     | 0.000001 | 4 | 2 | 14      | 3           | 2650   | 2650   | 0.94722 | 0.95187 |
| SND1      | 27018577 | eCLIP   | structure  | 0.04999487   | 50     | 0.0001   | 3 | 4 | 14      | 3           | 2413   | 2413   | 0.89622 | 0.88589 |
| TAF15     | 22081015 | PARCLIP | sequence   | 0.003209317  | 50     | 0.001    | 3 | 2 | 14      | -           | 7298   | 6606   | 0.96794 | 0.964   |
| TARDBP    | 27018577 | eCLIP   | sequence   | 0.0003341065 | 30     | 0.001    | 4 | 5 | 14      | -           | 2752   | 2752   | 0.98524 | 0.98712 |
| TIA1      | 27018577 | eCLIP   | sequence   | 0.009658455  | 30     | 0.001    | 2 | 5 | 14      | -           | 3073   | 3073   | 0.84148 | 0.86061 |
| TNRC6A    | 27018577 | eCLIP   | structure  | 0.04627634   | 50     | 0.001    | 3 | 0 | 14      | 3           | 2653   | 2653   | 0.83569 | 0.85761 |

which prevented the use of conventional fitting procedures for unimodal distributions. For each model, we then calculated the top position-wise score of each positive training site to construct a second ECDF. To get a threshold for filtering the peak score p-values, the score at 50 % of the distribution was taken and inserted into the first ECDF to get its p-value. This way we obtain an individual p-value threshold for each RBP model, allowing us to select binding sites with scores comparable to the scores found in the respective positive training sites. The obtained filter p-values for each model can be found in Supplementary Table 1.

### 3 Challenges and Limitations

Predicting combined interactions between lncRNAs, RBPs and target RNAs on a transcriptome-wide scale is an inherently difficult task, due to several reasons: firstly, the limited number of known lncRNA mechanism cases makes it difficult to tune the model. Specifically, the selection of various parameters in terms of distances between interactions and various cutoffs becomes nearly *ad hoc*. Moreover, it is unknown to what extent the studied cases occur in the cell or whether they are typical representatives of a certain class of interactions. Secondly, even with the careful filtering applied in this work, RNA-RNA and RNA-protein predictions are fairly non-specific. With thousands of predicted targets, it is likely that many are false positives. Given that only the most significant interaction combinations are included, it is difficult to determine which are true predictions since they are all plausible. Despite these difficulties, the presented work provides a solid starting point for further experimental investigation.

One way to improve the current approach would be the development of more realistic interaction models. As for the RBP-target prediction, information on RBP affinities for a range of target RNAs as well as the relative importance of target sequence, structure and context should help to design more accurate models. So far, detailed affinity distributions have only been reported for the *E. coli* C6 protein, utilizing the high-throughput sequencing kinetics (HiTS-KIN) protocol (Lin *et al.*, 2016). Lately, a more simple affinity approach was combined with estimating the sequential and structural binding properties of 78 human RBPs, using an RNA Bind-n-Seq variant with 5 different protein concentrations (Dominguez *et al.*, 2017). In order to improve prediction specificity, it is also possible to use CLIP data to cluster RBPs with common binding sites and to learn properties

from these sites, as shown by Li *et al.* (Li *et al.*, 2017). As for the lncRNA-target prediction, integrating protein binding information directly into the RNA-RNA interaction calculation might lead to the prediction of more realistic hybrids. Moreover, incorporating RNA structure probing data of the involved RNAs, e.g. determined by selective 2-hydroxyl acylation and profiling (SHAPE), could improve the hybrid prediction. As the number of studied lncRNA mechanisms gradually increases, machine learning approaches could further help to improve model performance by learning optimal parameter combinations from the data.

Another more immediate extension of this work would be the incorporation of additional data, such as new RBP predictions or miRNA interaction information. It is conceivable to assume that lncRNAs might block or sequester miRNAs, just as they do RBPs. Inclusion of miRNA target sites would therefore broaden the scope of mechanisms MechRNA can predict. The modular nature of MechRNA makes such extensions possible, which might open exciting new avenues for lncRNA research.

### References

- Bernhart, S. H., Hofacker, I. L., and Stadler, P. F. (2006). Local RNA base pairing probabilities in large sequences. *Bioinformatics*, **22**(5), 614–615.
- Busch, A., Richter, A. S., and Backofen, R. (2008). IntaRNA: efficient prediction of bacterial sRNA targets incorporating target site accessibility and seed regions. *Bioinformatics*, **24**(24), 2849–2856.
- Dominguez, D., *et al.* (2017). Sequence, structure and context preferences of human rna binding proteins. *bioRxiv*, page 201996.
- Jones, E., *et al.* (2001–). SciPy: Open source scientific tools for Python. [Online; accessed <today>].
- Lai, D. and Meyer, I. M. (2016). A comprehensive comparison of general rna–rna interaction prediction methods. *Nucleic acids research*, **44**(7), e61–e61.
- Li, Y. E., *et al.* (2017). Identification of high-confidence rna regulatory elements by combinatorial classification of rna–protein binding sites. *Genome biology*, **18**(1), 169.
- Lin, H.-C., *et al.* (2016). Analysis of the rna binding specificity landscape of c5 protein reveals structure and sequence preferences that direct rna p specificity. *Cell chemical biology*, **23**(10), 1271–1281.
- Mann, M., Wright, P. R., and Backofen, R. (2017). IntaRNA 2.0: enhanced and customizable prediction of RNA-RNA interactions. *Nucleic Acids Res.*
- Muckstein, U., *et al.* (2006). Thermodynamics of RNA-RNA binding. *Bioinformatics*, **22**(10), 1177–1182.
- Rehmsmeier, M., *et al.* (2004). Fast and effective prediction of microRNA/target duplexes. *RNA*, **10**(10), 1507–1517.
- Wright, P. R., *et al.* (2014). CopraRNA and IntaRNA: predicting small RNA targets, networks and interaction domains. *Nucleic Acids Res.*, **42**(Web Server issue), W119–123.

Table 2. Selected LncRNAs for MechRNA analysis. The lncRNAs vary in terms of what is known about their mechanisms, allowing MechRNA to be tested with various amounts of a priori data. PCAT1 has a question mark indicating that competitive binding is the hypothesis not been validated yet.

| TP53 Transcript        | Protein Binding |             | RNA-RNA Interaction |             |            |            | FE             |
|------------------------|-----------------|-------------|---------------------|-------------|------------|------------|----------------|
|                        | HuR S           | HuR E       | TP53 S              | TP53 E      | 7SL S      | 7SL E      |                |
| ENST00000618944        | 1950            | 1971        | 1980                | 2022        | 256        | 298        | -51.563        |
| ENST00000504937        | 1817            | 1838        | 1847                | 1889        | 256        | 298        | -51.563        |
| ENST00000445888        | 2071            | 2092        | 2101                | 2143        | 256        | 298        | -51.563        |
| ENST00000420246        | 2201            | 2222        | 2231                | 2273        | 256        | 298        | -51.563        |
| <b>ENST00000269305</b> | <b>2125</b>     | <b>2146</b> | <b>2155</b>         | <b>2197</b> | <b>256</b> | <b>298</b> | <b>-51.563</b> |
| ENST00000610292        | 2185            | 2206        | 2215                | 2257        | 256        | 298        | -51.563        |
| ENST00000620739        | 2125            | 2146        | 2155                | 2197        | 256        | 298        | -51.563        |
| ENST00000455263        | 2128            | 2149        | 2158                | 2200        | 256        | 298        | -51.563        |
| ENST00000610623        | 1877            | 1898        | 1907                | 1949        | 256        | 298        | -51.563        |
| ENST00000504290        | 1877            | 1898        | 1907                | 1949        | 256        | 298        | -51.563        |
| ENST00000610538        | 2128            | 2149        | 2158                | 2200        | 256        | 298        | -51.563        |
| ENST00000619485        | 2071            | 2092        | 2101                | 2143        | 256        | 298        | -51.563        |
| ENST00000510385        | 1950            | 1971        | 1980                | 2022        | 256        | 298        | -51.563        |
| ENST00000622645        | 2201            | 2222        | 2231                | 2273        | 256        | 298        | -51.563        |
| ENST00000619186        | 1817            | 1838        | 1847                | 1889        | 256        | 298        | -51.563        |
| ENST00000617185        | 2270            | 2291        | 2300                | 2342        | 256        | 298        | -51.563        |
